# Supplementary material for: In situ construction of self-supporting Ni–Fe sulfide for high-efficiency oxygen evolution
Source: Royal Society of Chemistry journal article supplement (doi:10.1039/d2nj00489e), 2022-01-01
Supplement: d2nj00489e1.pdf [file d2nj00489e1.pdf]

***In-situ* construction of self-supporting Ni-Fe sulfide for high-efficient oxygen evolution**

Mingxin Hao,<sup>a,1</sup> Huizhen Wang,<sup>a,1</sup> Xiaoling Zhang,<sup>a</sup> Yangdong Qu,<sup>a</sup> Cuijuan Xuan,<sup>a</sup>  
Zexing Wu,<sup>b,\*</sup> Min Cui,<sup>c</sup> and Jie Wang<sup>a,\*</sup>

<sup>a</sup> College of Chemistry and Pharmaceutical Sciences, Qingdao Agricultural University, Qingdao 266109, P. R. China

<sup>b</sup> State Key Laboratory Base of Eco-chemical Engineering, College of Chemistry and Molecular Engineering, Qingdao University of Science & Technology, 53 Zhengzhou Road, 266042, Qingdao, P. R. China

<sup>c</sup> Collaborative Innovation Center for Green Chemical Manufacturing and Accurate Detection, Key Laboratory of Interfacial Reaction & Sensing Analysis in Universities of Shandong, School of Chemistry and Chemical Engineering, University of Jinan, Jinan 250022, P. R. China

<sup>1</sup> The two authors (Y. Wang and H. Wang) contributed equally to this work.

\*Corresponding authors.

E-mail address: [wangjie@qau.edu.cn](mailto:wangjie@qau.edu.cn) (J. Wang); [splswzx@qust.edu.cn](mailto:splswzx@qust.edu.cn) (Z. Wu)

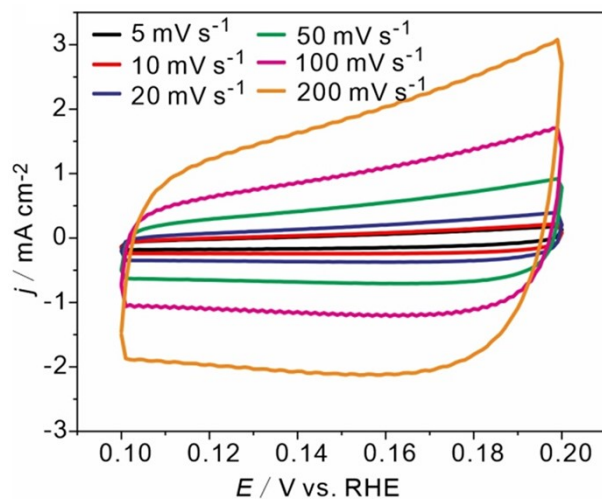

**Figure S1** CV curves of (Fe,Ni)<sub>3</sub>S<sub>4</sub>-90 at potential window from 1.1 to 1.2 V under different scan rates.

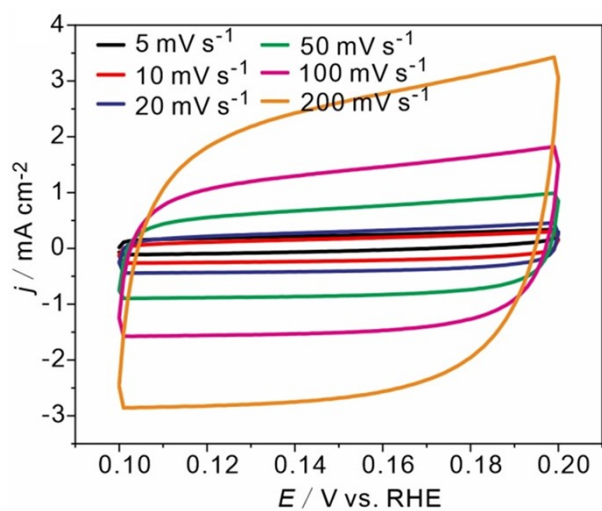

**Figure S2** CV curves of (Fe,Ni)<sub>3</sub>S<sub>4</sub>-130 at potential window from 1.1 to 1.2 V under different scan rates.

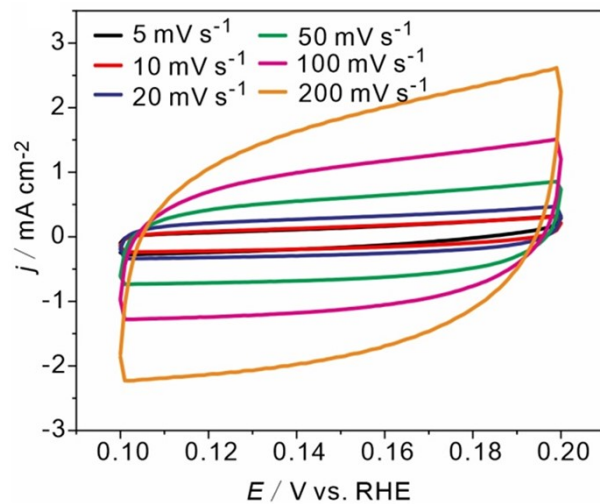

**Figure S3** CV curves of (Fe,Ni)<sub>3</sub>S<sub>4</sub>-150 at potential window from 1.1 to 1.2 V under different scan rates.

**Table S1** Comparison of key parameters for the OER performance of recent published references related to Fe-based catalysts.

| Catalysts                                             | $j$<br>(mA cm <sup>-2</sup> ) | $E_{10 \text{ mA cm}^{-2}}$<br>OER (V) | Electrolyte | Refs      |
|-------------------------------------------------------|-------------------------------|----------------------------------------|-------------|-----------|
| NiCo <sub>2</sub> O <sub>4</sub> @NiCoFe-OH           | 10                            | 235.0                                  | 1 M KOH     | [1]       |
| Co-NC@CoFeS <sub>2</sub>                              | 10                            | 275.0                                  | 1 M KOH     | [2]       |
| NiFeO <sub>x</sub> film                               | 10                            | 336.0                                  | 1 M KOH     | [3]       |
| NiFe LDH                                              | 10                            | 300.0                                  | 1 M KOH     | [4]       |
| Ni-Fe nanoparticles                                   | 10                            | 311.0                                  | 1 M NaOH    | [5]       |
| NiFe <sub>2</sub> O <sub>x</sub> Spinels              | 10                            | 356.0                                  | 1 M NaOH    | [6]       |
| FeNiS <sub>2</sub>                                    | 10                            | 310.0                                  | 0.1 M KOH   | [7]       |
| Ni-Fe-O-S                                             | 10                            | 272.0                                  | 1 M KOH     | [8]       |
| FeNi <sub>2</sub> S <sub>4</sub> hollow balloons      | 10                            | 273.0                                  | 1 M KOH     | [9]       |
| (Ni, Fe)S <sub>2</sub> @MoS <sub>2</sub>              | 10                            | 270.0                                  | 1 M KOH     | [10]      |
| Ni-Fe-S <sub>3:1</sub> -160                           | 10                            | 207.0                                  | 1 M KOH     | [11]      |
| NiS/Fe <sub>3</sub> O <sub>4</sub> /carbon nanotube   | 10                            | 243.0                                  | 1 M KOH     | [12]      |
| Fe <sub>3</sub> O <sub>4</sub> @NiS <sub>x</sub> /rGO | 10                            | 330.0                                  | 1 M KOH     | [13]      |
| Fe-Ni <sub>3</sub> S <sub>2</sub> /FeNi               | 10                            | 282.0                                  | 1 M KOH     | [14]      |
| (Fe,Ni) <sub>3</sub> S <sub>4</sub> -110              | 50                            | 240.0                                  | 1 M KOH     | This work |

## References

- [1] S. Li, X. Yang, S. Yang, Q. Gao, S. Zhang, X. Yu, Y. Fang, S. Yang, X. Cai, *J. Mater. Chem. A*, 2020, **8**, 5601-5611.
- [2] Y. Wang, W. Jin, C. Xuan, J. Wang, J. Li, Q. Yu, B. Li, C. Wang, W. Cai, J. Wang, *J. Power Sources*, 2021, **512**, 230430.
- [3] L. Trotochaud, J. K. Ranney, K. N. Williams and S. W. Boettcher, *J. Am. Chem. Soc.*, 2012, **134**, 17253-17261.
- [4] F. Song and X. Hu, *Nat. Commun.*, 2014, **5**, 4477.
- [5] S. L. Candelaria, N. M. Bedford, T. J. Woehl, N. S. Rentz, A. R. Showalter, S. Pylypenko, B. A. Bunker, S. Lee, B. Reinhart, Y. Ren, *ACS Catal.*, 2017, **7**, 365-379.

- [6] C. N. Chervin, P. A. DeSario, J. F. Parker, E. S. Nelson, B. W. Miller, D. R. Rolison, J.W. Long, *ChemElectroChem*, 2016, **3**, 1369-1375.
- [7] J. Jiang, S. Lu, H. Gao, X. Zhang and H.-Q. Yu, *Nano Energy*, 2016, **27**, 526-534.
- [8] C. Xuan, J. Wang, W. Xia, J. Zhu, Z. Peng, K. Xia, W. Xiao, H.L. Xin, D. Wang, Heteroatom (P, B, or S) incorporated NiFe-based nanocubes as efficient electrocatalysts for the oxygen evolution reaction. *J. Mater. Chem. A*, 2018, **6**, 7062-7069.
- [9] H. Wang, J. Tang, Y. Li, H. Chu, Y. Ge, R. Baines, P. Dong, P. M. Ajayan, J. Shen, M. Ye, *J. Mater. Chem. A*, 2018, **6**, 19417-19424.
- [10] Liu Y., Jiang S., Li S., Zhou L., Li Z., Li J., Shao M., *Appl. Catal. B-Environ.*, 2019, **247**, 107-114.
- [11] C. Xuan, W. Lei, J. Wang, T. Zhao, C. Lai, Y. Zhu, Y. Sun, D. Wang, *J. Mater. Chem. A*, 2019, **7**, 12350-12357.
- [12] K. Srinivas, Y. Chen, B. Wang, B. Yu, X. Wang, Y. Hu, Y. Lu, W. Li, W. Zhang D. Yang, *ACS Appl. Mater. Interfaces*, 2020, **12**, 31552-31563.
- [13] G. Zhu, X. Xie, Y. Liu, X. Li, K. Xu, X. Shen, Y. Yao, S.A. Shah, *Appl. Surf. Sci.* 2018, **442**, 256-263.
- [14] C.Z. Yuan, Z.T. Sun, Y.F. Jiang, Z.K. Yang, N. Jiang, Z.W. Zhao, U.Y. Qazi, W.H. Zhang, A.W. Xu, *Small*, 2017, **13** 1604161.
